# Supplementary material for: Canonical Stimulation of the NLRP3 Inflammasome by Fungal Antigens Links Innate and Adaptive B-Lymphocyte Responses by Modulating IL-1β and IgM Production
Source: PubMed Central journal article supplement (PMC5684107; doi:10.3389/fimmu.2017.01504), 2017-11-09

**Canonical Stimulation of the NLRP3 Inflammasome by Fungal Antigens  
Links Innate and Adaptive B-lymphocyte Responses by Modulating IL-1 $\beta$  and  
IgM Production.**

Mohamed F. Ali\*

Harika Dasari\*

Virginia P. Van Keulen\*

Eva M. Carmona<sup>\*,#,†</sup>

\*From the Thoracic Diseases Research Unit and the #Division of Pulmonary Critical Care and Internal Medicine, Department of Medicine Mayo Clinic and Foundation, Rochester, Minnesota 55905

†Corresponding Author: Eva M Carmona, MD, PhD, 8-48 Stabile Building, Mayo Clinic, Rochester, Minnesota, 55905, Phone: (507) 284-4162, FAX (507) 284-4521, E-mail: carmona.eva@mayo.edu

**Supplement 1. Cell viability after different specific inhibitors.** XTT was determined in untreated cells (NTC) or after the use of VX765, YVAD-CMK, MCC950, oxATP and KCL at the concentrations indicated. Data are representative of at least two independent experiments.

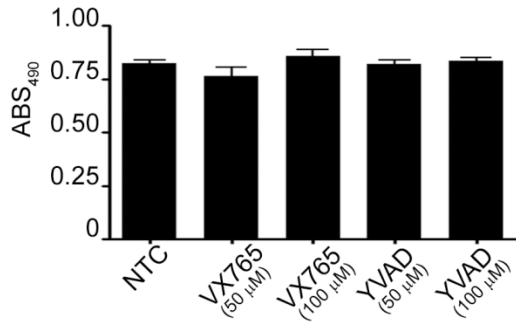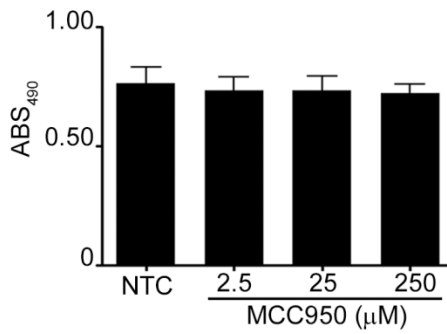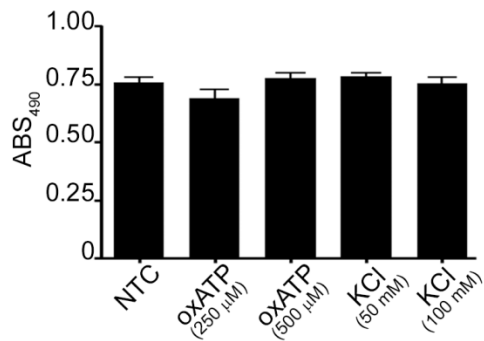

**Supplement 2. IgM release after CpG stimulation.** IgM was measured by ELISA in the cell supernatant of B-lymphocytes after different concentrations of CpG or after different periods of time. Data are representative of at least two independent experiments.

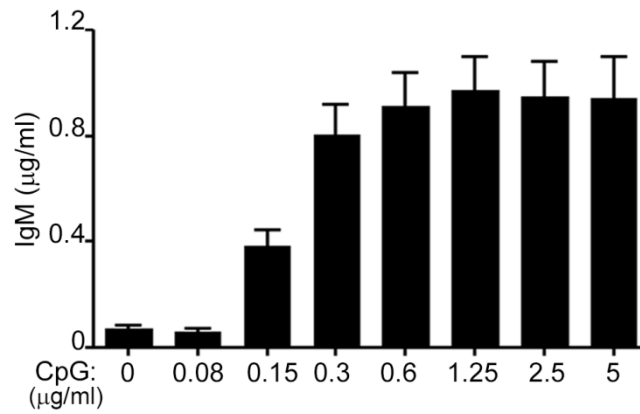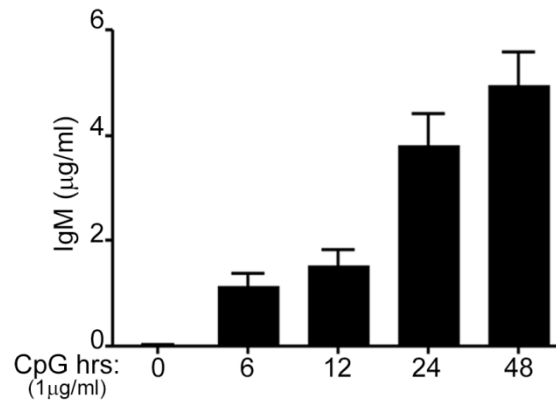

**Supplement 3. Fungal CpG from *Aspergillus fumigatus* stimulate IgM via NLRP3 and mTOR. (A)** IgM was measured by ELISA in the cell supernatant of unstimulated (NTC) and AF1 stimulated cells in the presence of 50 $\mu$ M oxATP, 50mM KCL, 50 $\mu$ M YVAD-CHO , 50 $\mu$ M YVAD-CMK, 100  $\mu$ M of MCC950 and 100nM Rapamycin. **(B)** Immunoblot analysis of p-mTOR and total mTOR after stimulation with CpG, AF1 and AF2 as indicated. CpG, AF1 and AF2 were used at a concentration of 1 $\mu$ g/ml. Data are representative of at least three donors of three independent experiments. \*\*\* $p$ <0.0001.

A]

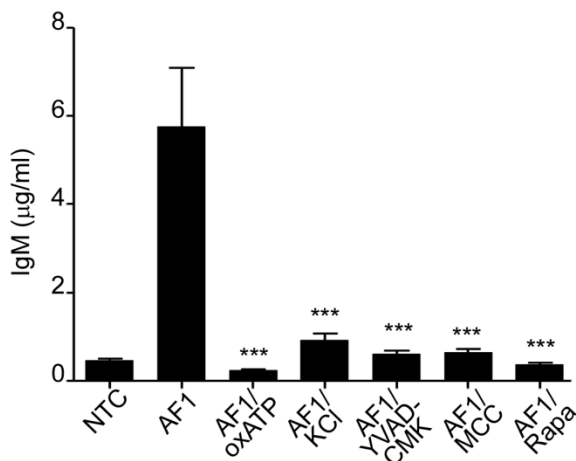

B]

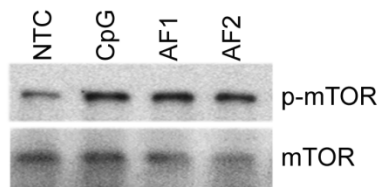

**Supplement 4. 4EBP1 activation via ERK 1/2.** Immunoblot analysis of p-4EBP1, p-ERK and p-mTOR in nonstimulated cells (NTC) and after curdlan (Curd) stimulation for 30 min. Some cells were preincubated with the ERK 1/2 inhibitor, PD98059 (PD), and Rapamycin (Rapa) as indicated. Total 4EBP1, ERK 1/2 and mTOR were used as loading control. PD was used at a concentration of 10 $\mu$ M and Rapamycin at 100nM. Data are representative of at least three independent experiments with different donor preparations.

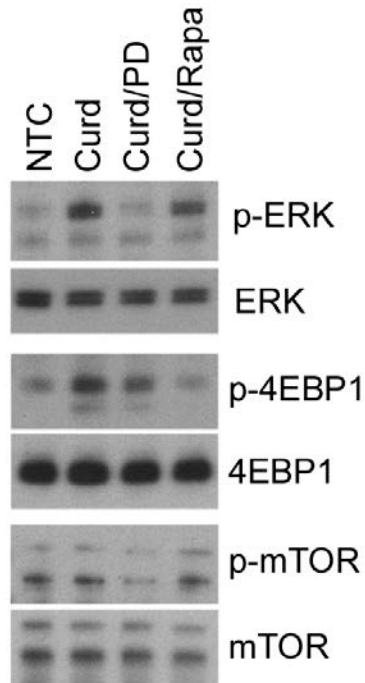

Supplement: Presentation_1.pdf [file Presentation_1.pdf]
